# Supplementary material for: Exploring the interaction between a fluorescent Ag(i)-biscarbene complex and non-canonical DNA structures: a multi-technique investigation
Source: Royal Society of Chemistry journal article supplement (doi:10.1039/d4dt00851k), 2024-01-01
Supplement: d4dt00851k1.pdf [file d4dt00851k1.pdf]

## SUPPORTING INFORMATION

### Exploring the interaction between a fluorescent Ag(I)-biscarbene complex and non-canonical DNA structures: a multi-technique investigation

Francesca Binacchi, Ester Giorgi, Giacomo Salvadori, Damiano Cirri, Mariassunta Stifano, Aurora Donati, Linda Garzella, Natalia Busto, Begona Garcia, Alessandro Pratesi, Tarita Biver

#### Table of Contents

|                                                    |    |
|----------------------------------------------------|----|
| NMR spectra .....                                  | 1  |
| Stability and solubility in aqueous solution ..... | 5  |
| Cellular tests .....                               | 8  |
| BSA interaction .....                              | 10 |
| DNA/RNA interaction.....                           | 12 |
| G-quadruplexes .....                               | 15 |
| Experimental details .....                         | 20 |
| K summary table.....                               | 21 |

## NMR spectra

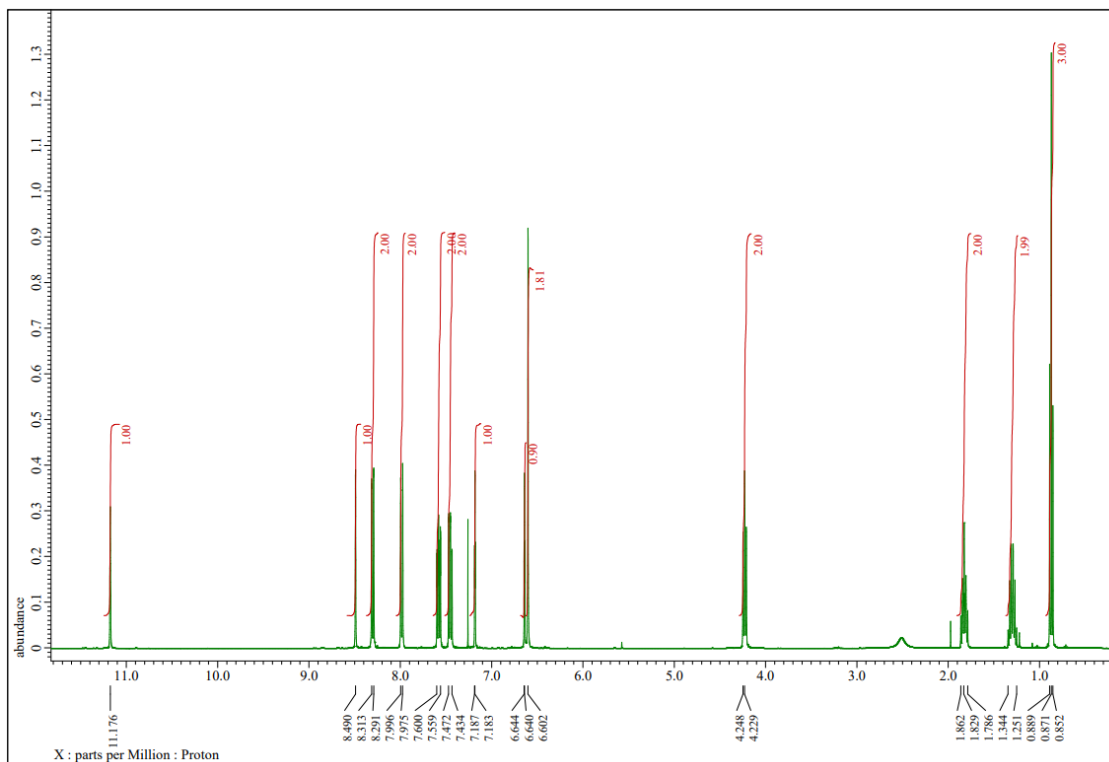

**Figure S1** 1-(anthracen-9-ylmethyl)-3-butylimidazolium chloride, BIA (**1**), <sup>1</sup>H NMR

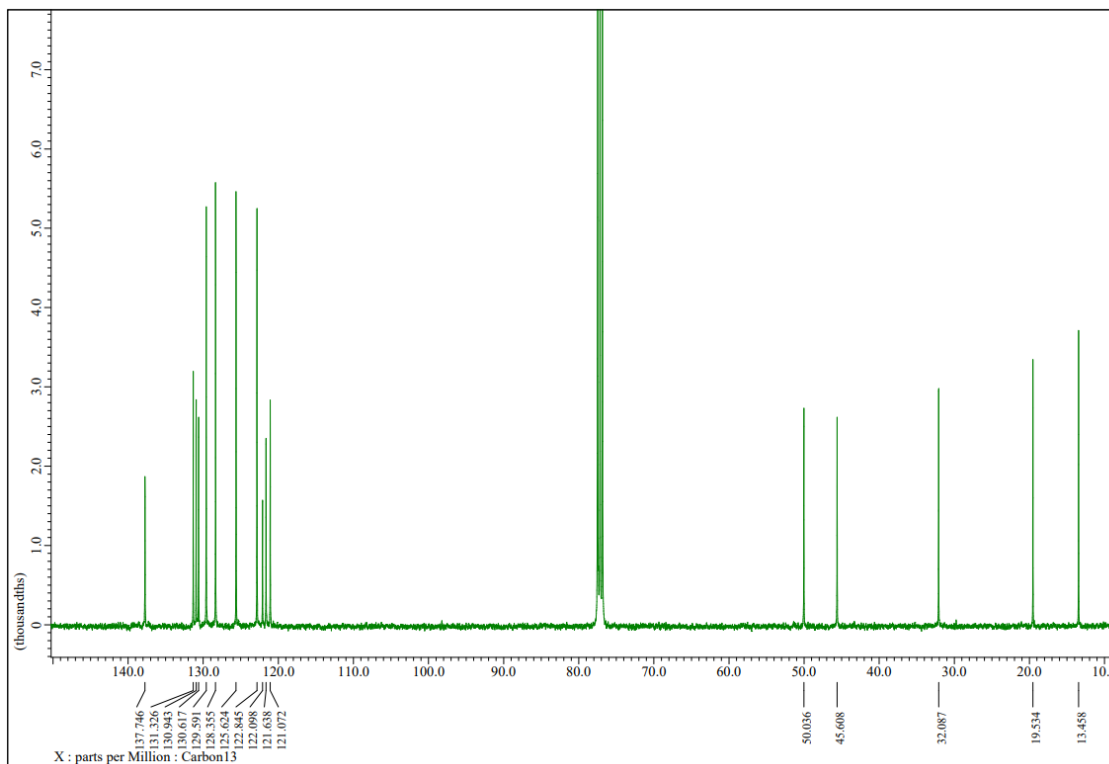

**Figure S2** 1-(anthracen-9-ylmethyl)-3-butylimidazolium chloride, BIA (**1**), <sup>13</sup>C NMR

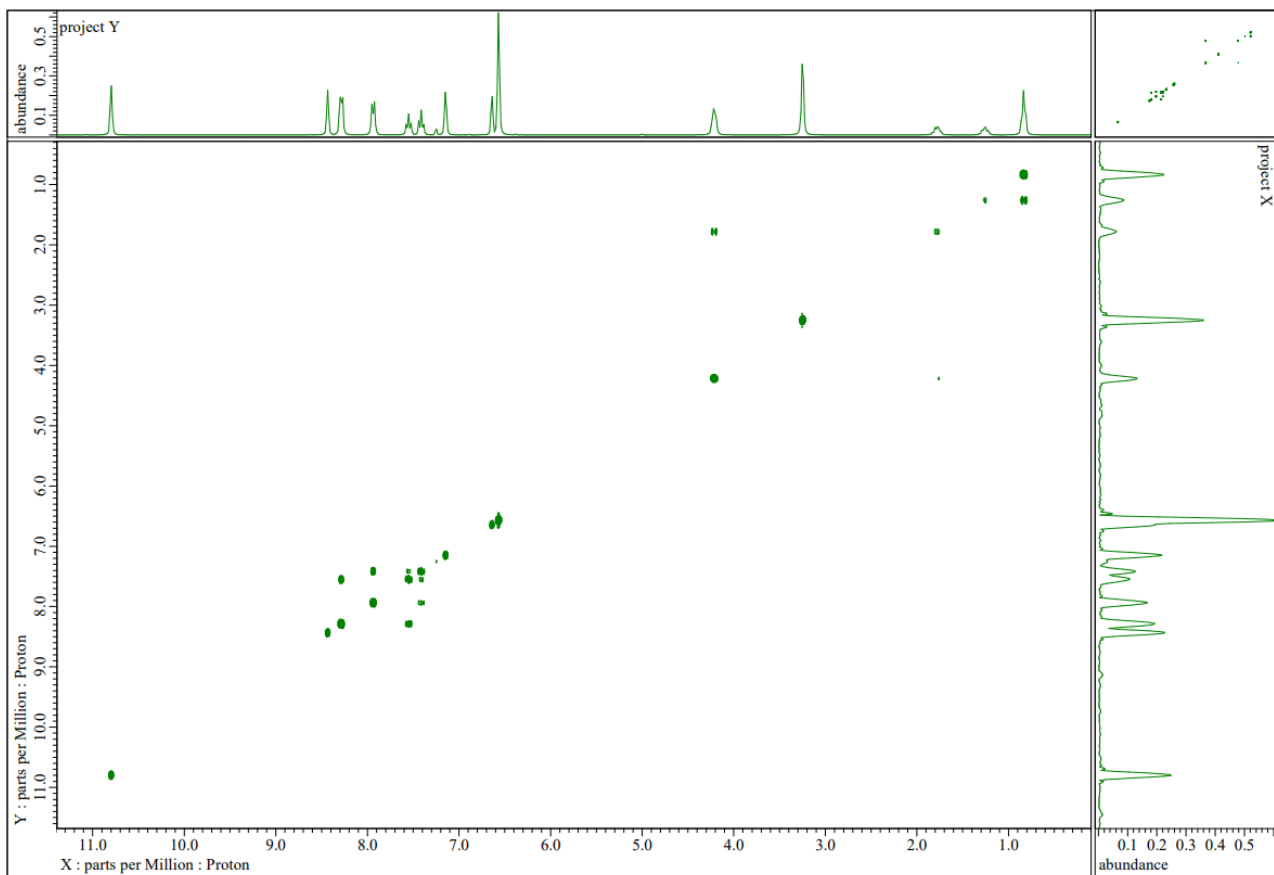

Figure S3 1-(anthracen-9-ylmethyl)-3-butylimidazolium chloride, BIA (1),  $^1\text{H}$ - $^1\text{H}$  COSY NMR

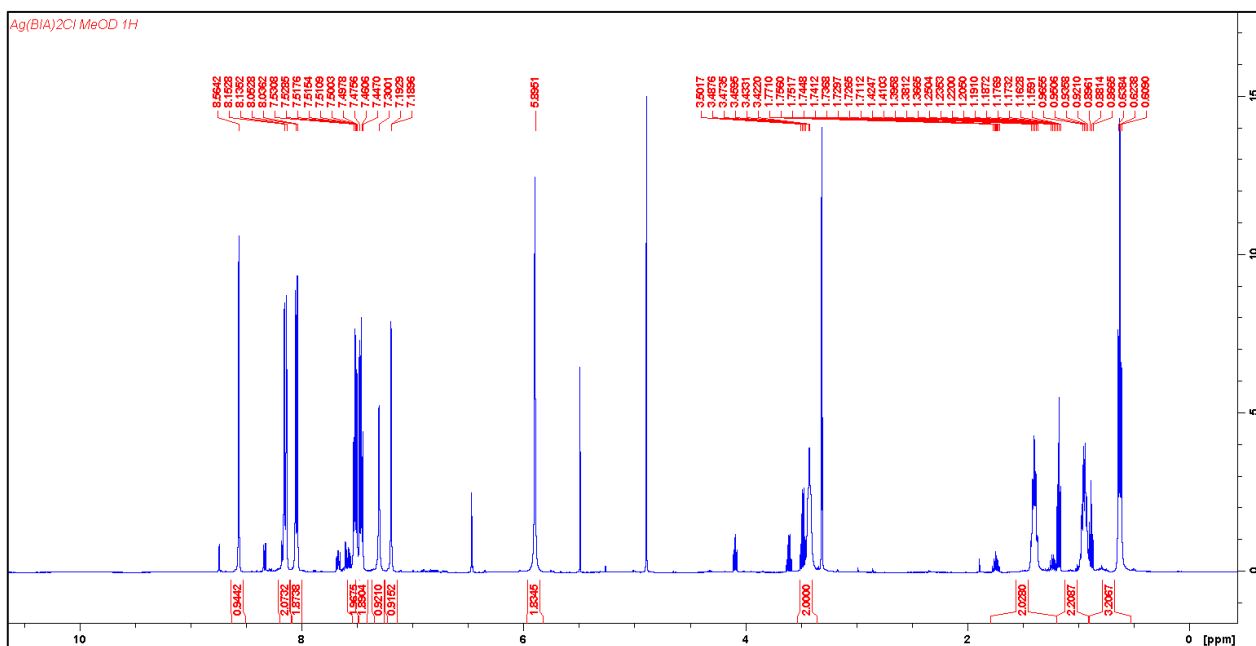

Figure S4 Bis(1-(anthracen-9-ylmethyl)-3-butylimidazol-2-ylidene) silver chloride  $[\text{Ag}(\text{BIA})_2]\text{Cl}$  (2),  $^1\text{H}$  NMR

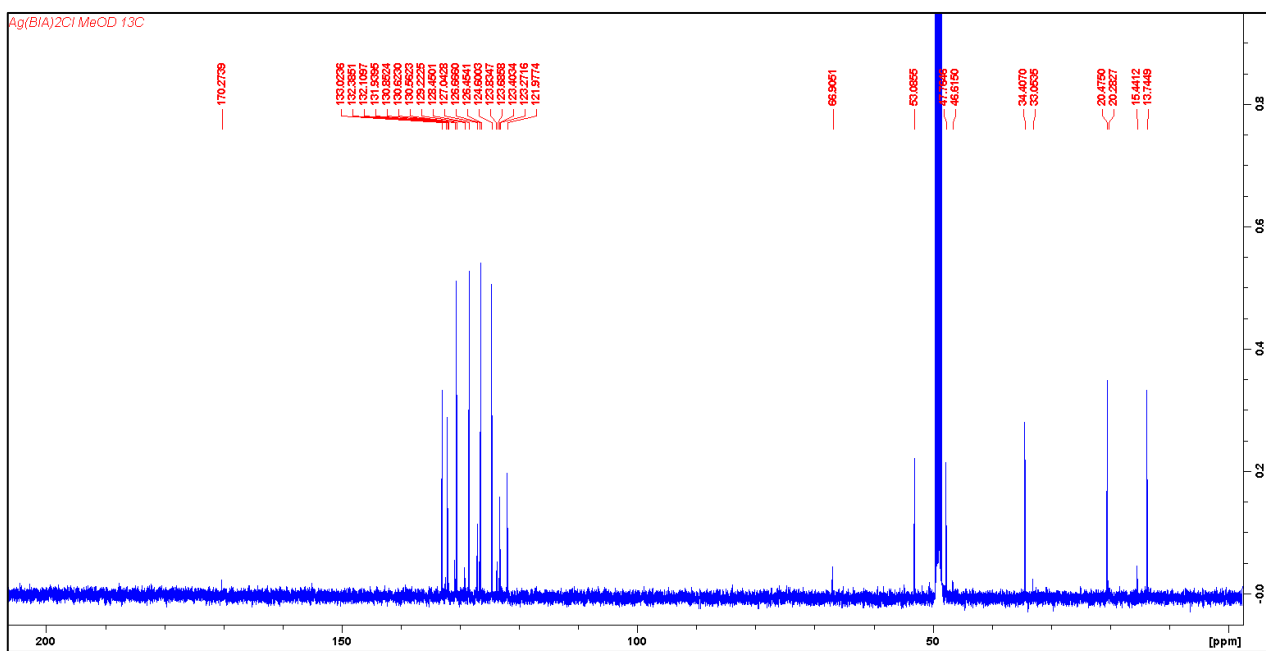

Figure S5 Bis(1-(anthracen-9-ylmethyl)-3-butylimidazol-2-ylidene) silver chloride [Ag(BIA)<sub>2</sub>]Cl (**2**), <sup>13</sup>C NMR

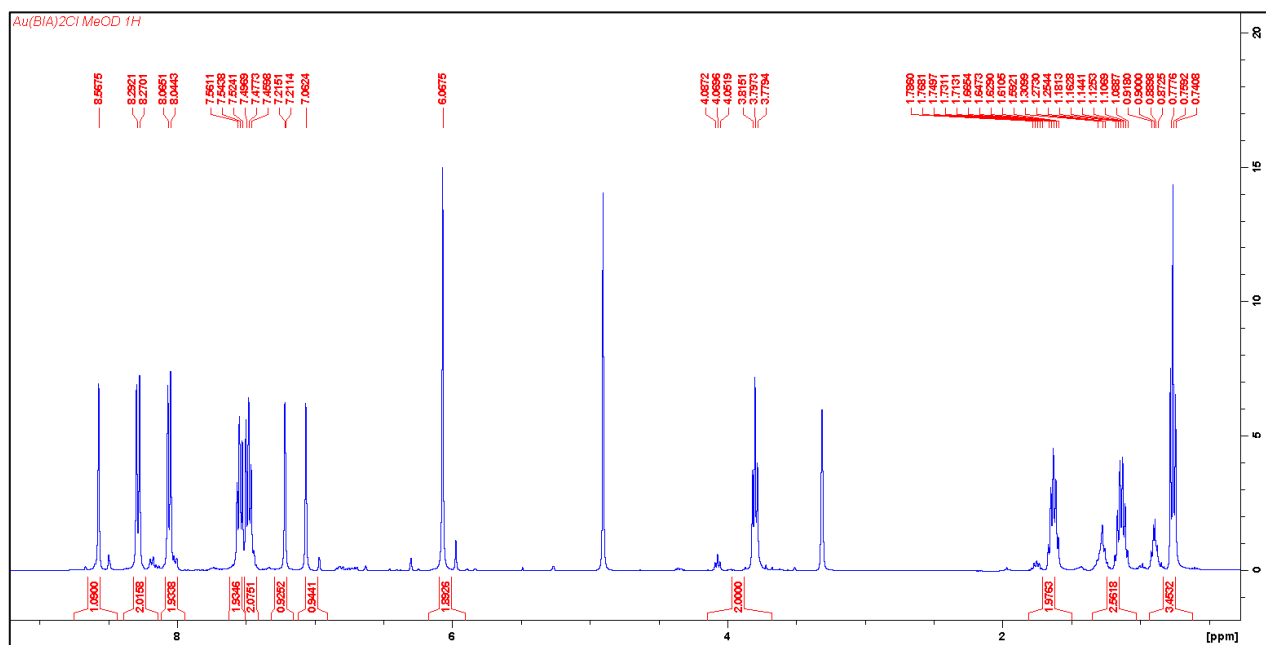

Figure S6 Bis(1-(anthracen-9-ylmethyl)-3-butylimidazol-2-ylidene) gold chloride [Au(BIA)<sub>2</sub>]Cl (**3**), <sup>1</sup>H NMR

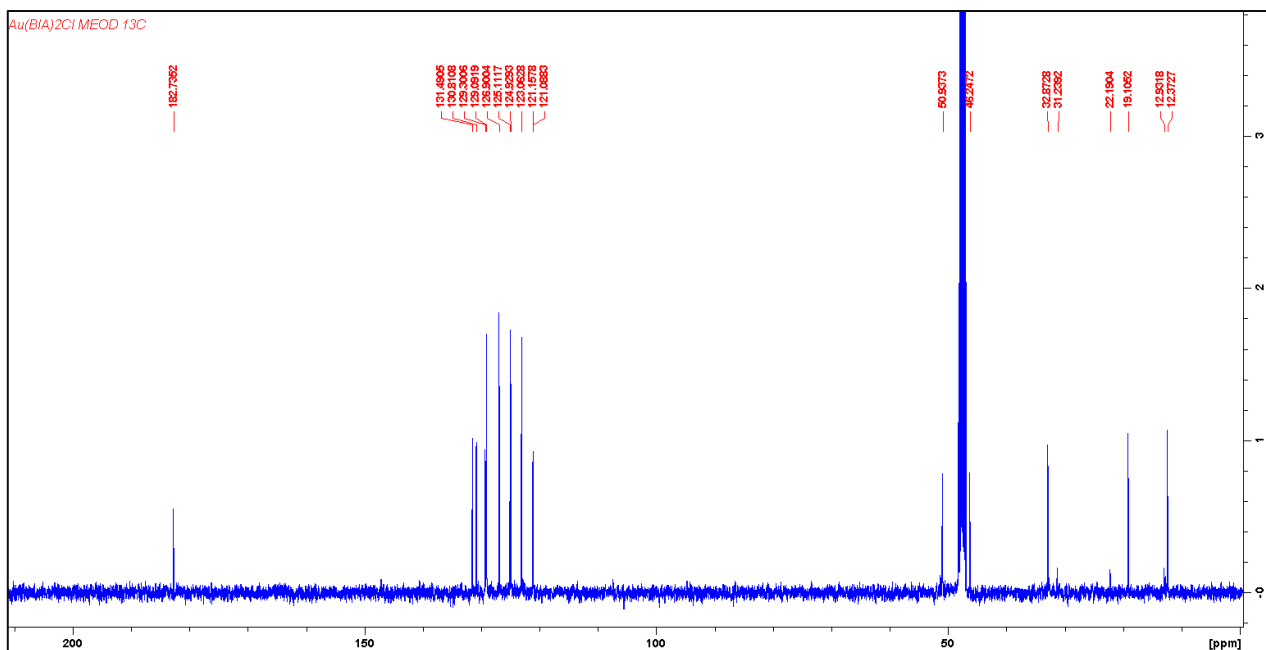

**Figure S7** Bis(1-(anthracen-9-ylmethyl)-3-butylimidazol-2-ylidene) gold chloride [Au(BIA)<sub>2</sub>]Cl (**3**), <sup>13</sup>C NMR

## Stability and solubility in aqueous solution

To verify the stability of  $[\text{Ag}(\text{BIA})_2]\text{Cl}$  and  $[\text{Au}(\text{BIA})_2]\text{Cl}$  complexes in a buffer solution (NaCl 0.1 M, NaCac 2.5 mM, pH = 7.0, T = 25.0 °C) a UV spectrum was recorded every 10 minutes from 0 to 3 hours, mixing the solution before recording the spectrum. Three hours is a time range in line with the time needed for our experiments. The silver compound is stable (Figure S8); differently, as shown in Figure S9, the gold complex profile is not fully reproducible, with a change in the spectral profile that suggests some aggregation process on the cell walls; in fact, the peaks at 256 nm and 273 nm switch their prevalence as time goes by, despite mixing.

This hypothesis is confirmed by spectra registered at an increasing temperature in the 25.0 - 90.0 °C range (one every 5.0 °C). The silver complex undergoes limited variations confirming sufficient stability (Figure S10); in the gold complex (Figure S11), the spectra undergo more significant changes but with the maximum at 274 nm always remaining the main one at the highest temperatures and thus discarding degradation processes. These lower stability issues, in some cases, prevented performing with the gold complex the same detailed study done with silver; on the other hand, the experiments below still enabled us to compare the features driven by the two different metal centres.

In the case of the silver compound, absorption measurements were performed also by varying the metal complex concentration to verify the linearity of the Lambert-Beer in the working concentration range; this was respected at all the wavelengths (Figure S12A). To assess whether aggregation phenomena are at play, we can emphasize any deviations from linearity by evaluating the ratio between two wavelengths. In the absence of aggregation, the ratio should be constant: Figure S12B shows that the silver complex does not undergo auto-aggregation.

The analysed metal complexes contain an anthracenyl residue, which is fluorescent. Only the silver complex showed a stable fluorescence signal in solution; the emission spectrum of  $[\text{Ag}(\text{BIA})_2]^+$  recorded at  $\lambda_{\text{ex}} = 368$  nm shows emission maxima at 392 nm, 415 nm, and 438 nm (Figure S13).

Fluorescence emission spectra of  $[\text{Ag}(\text{BIA})_2]^+$  were also done by varying the complex concentration to verify the linearity between concentration and fluorescence signal (Figure S14). Linearity is respected in the investigated concentration range ( $C_{\text{Ag}}$  from 0.649 nM to 0.352  $\mu\text{M}$ ).

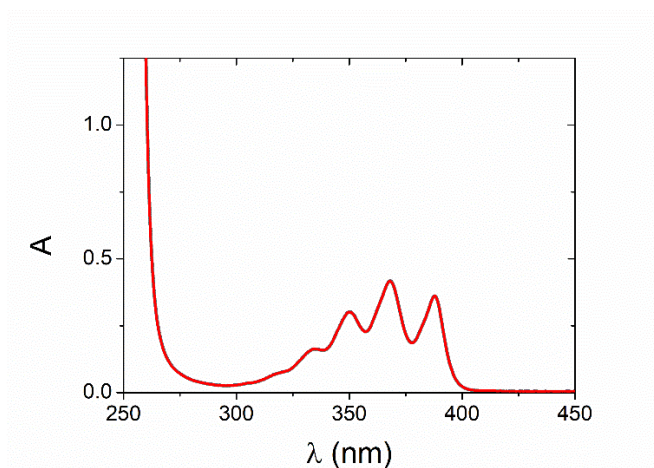

**Figure S8** Spectra of  $[\text{Ag}(\text{BIA})_2]^+$  in aqueous solution ( $C_{\text{Ag}} = 22.0 \mu\text{M}$ ) recorded during the time. The spectra are done every 10 min from 0 (black line) to 3 (red line) hours, mixing every time before recording the spectrum. NaCl 0.1 M, NaCac 2.5 mM, pH = 7.0, T = 25.0 °C.

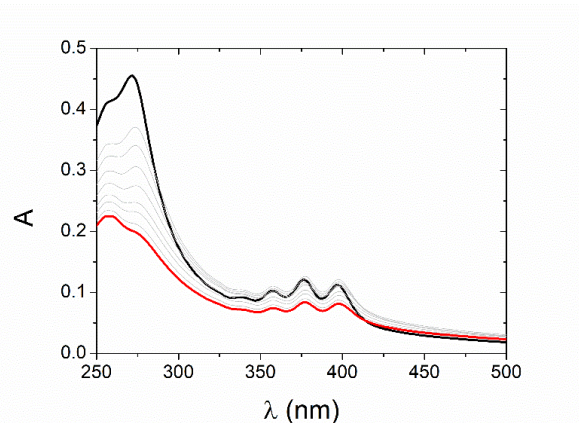

**Figure S9** Spectra of  $[\text{Au}(\text{BIA})_2]^+$  in aqueous solution ( $C_{\text{Au}} = 6.55 \mu\text{M}$ ) recorded during the time. The spectra are done every 20 min from 0 (black line) to 3 (red line) hours, mixing every time before recording the spectrum. NaCl 0.1 M, NaCac 2.5 mM, pH = 7.0, T = 25.0 °C.

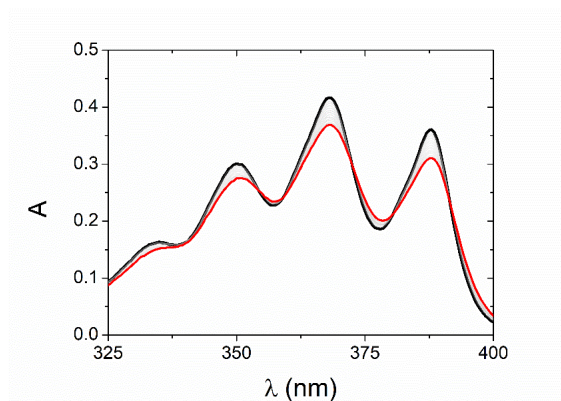

**Figure S10** Spectra of  $[\text{Ag}(\text{BIA})_2]^+$  in aqueous solution ( $C_{\text{Ag}} = 22.0 \mu\text{M}$ ) at different temperatures (one spectrum every 5.0 °C) from 25 °C (black line) to 90 °C (red line). NaCl 0.1 M, NaCac 2.5 mM, pH = 7.0.

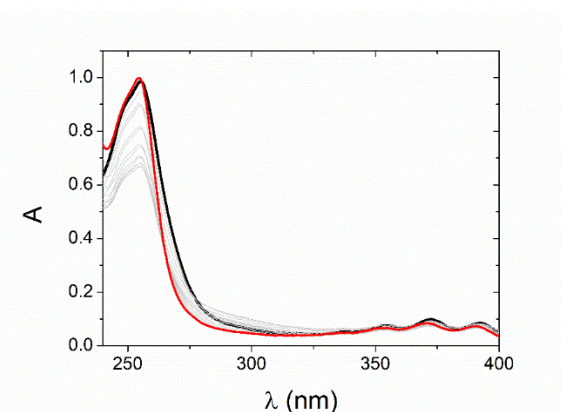

**Figure S11** Spectra of  $[\text{Au}(\text{BIA})_2]^+$  in aqueous solution ( $C_{\text{Au}} = 10.9 \mu\text{M}$ ) at different temperatures (one spectrum every 5.0 °C) from 25 °C (black line) to 90 °C (red line). NaCac 2.5 mM, pH = 7.0.

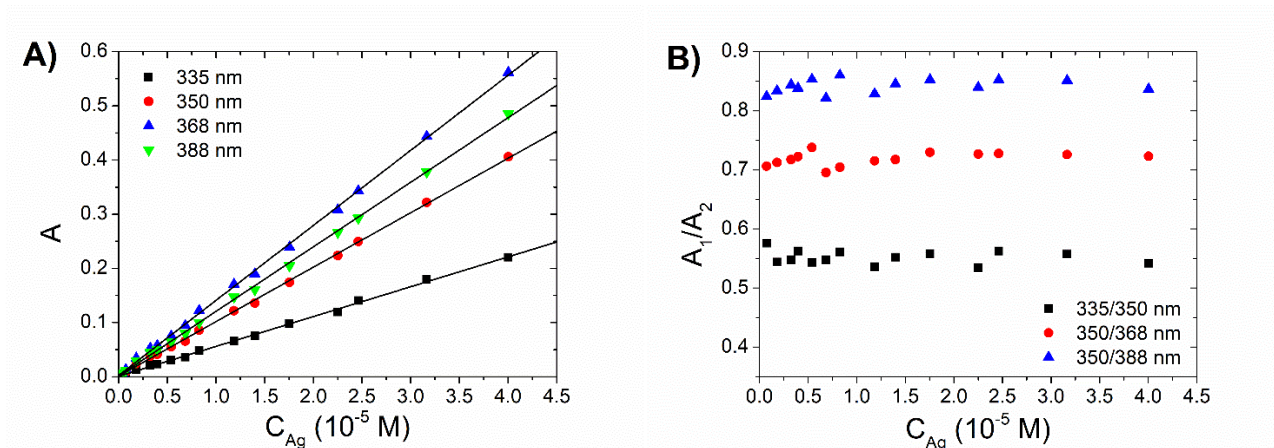

**Figure S12** On the left, absorbance at a different wavelength at the increasing amount of  $[Ag(BIA)_2]^+$ . On the right, the ratio of two different absorbances  $A_1/A_2$  as a function of the concentration of  $[Ag(BIA)_2]^+$ . NaCl 0.1 M, NaCac 2.5 mM, pH = 7.0, T = 25.0 °C.

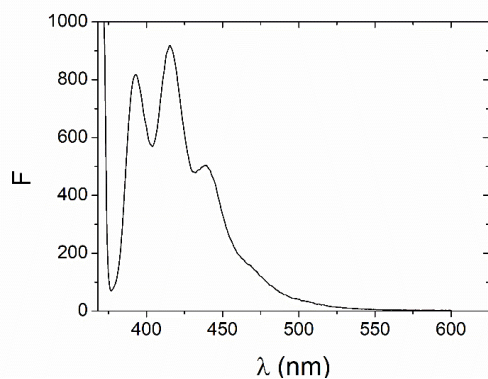

**Figure S13** Emission spectrum of  $[Ag(BIA)_2]^+$ .  $C_{Ag} = 0.216 \mu\text{M}$ , NaCl 0.1 M, NaCac 2.5 mM, pH = 7.0, T = 25.0°C,  $\lambda_{ex} = 368$  nm, slit 5 nm.

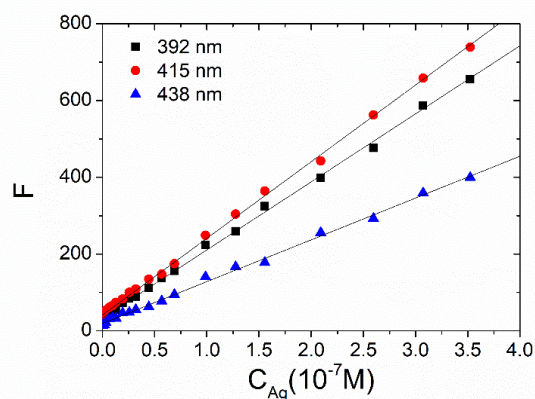

**Figure S14** Fluorescence intensities at different wavelengths for increasing amounts of  $[Ag(BIA)_2]^+$ . NaCl 0.1 M, NaCac 2.5 mM, pH = 7.0, T = 25.0 °C,  $\lambda_{ex} = 368$  nm, slit 5 nm.



## Cellular tests

### Cytotoxicity

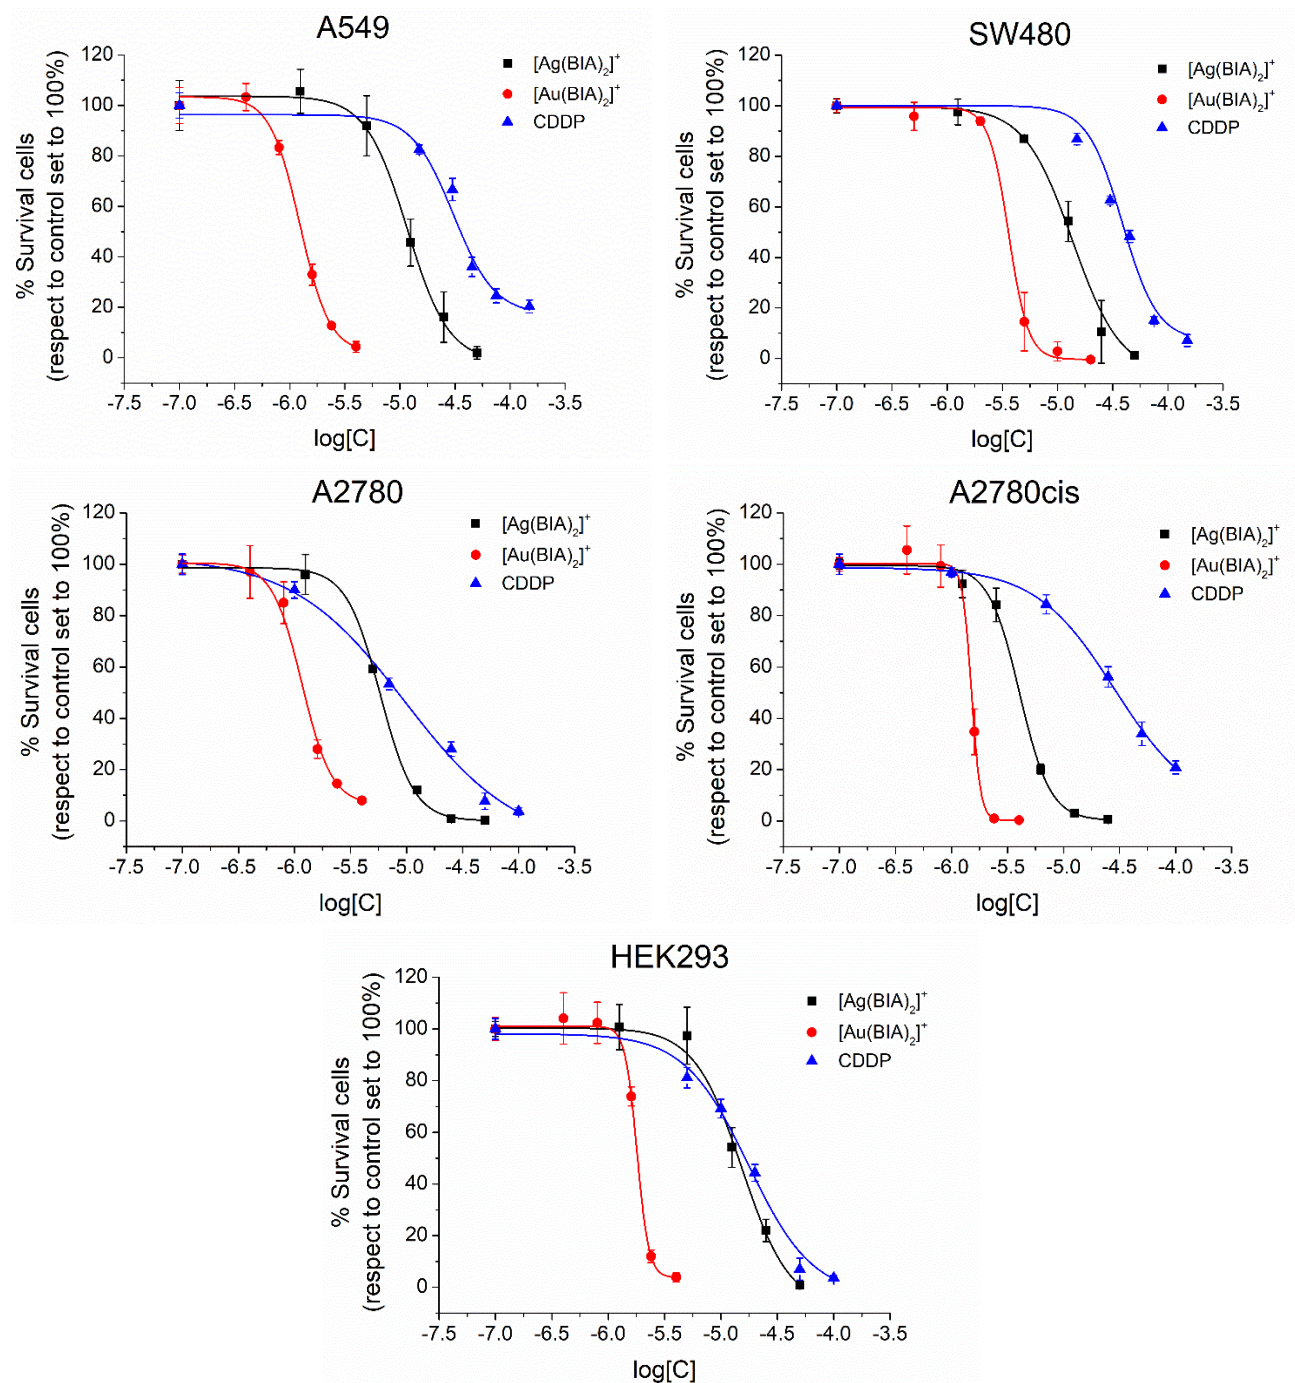

**Figure S15** Percentage of surviving cells as a function of [Ag(BIA)<sub>2</sub>]<sup>+</sup>, [Au(BIA)<sub>2</sub>]<sup>+</sup>, and CDDP concentration on A549, SW480, A2780, A2780cis and HEK293 cell lines.

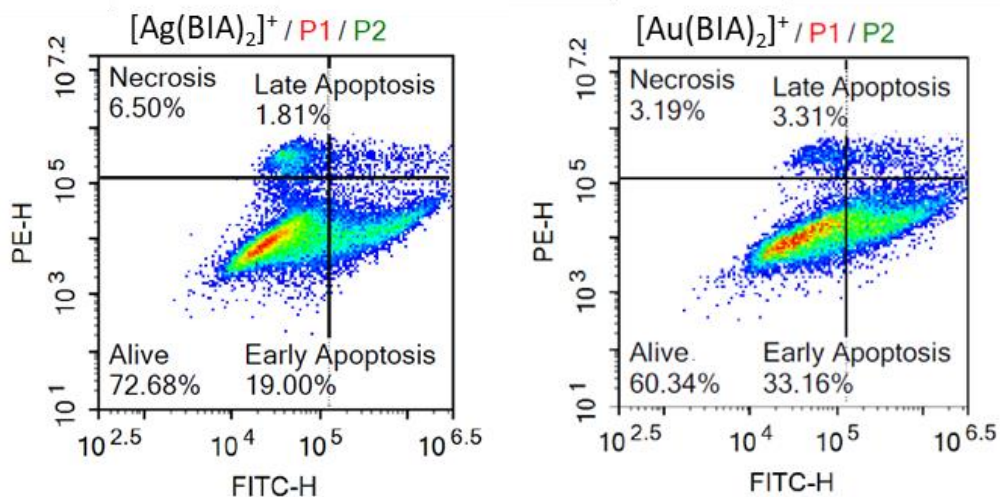

**Figure S16** Annexin V-FITC/PI double staining. Screenshots of the software outcome based on a NovoCyte Flow cytometer experiment analysed by using the NovoExpress 1.4.0 Software.

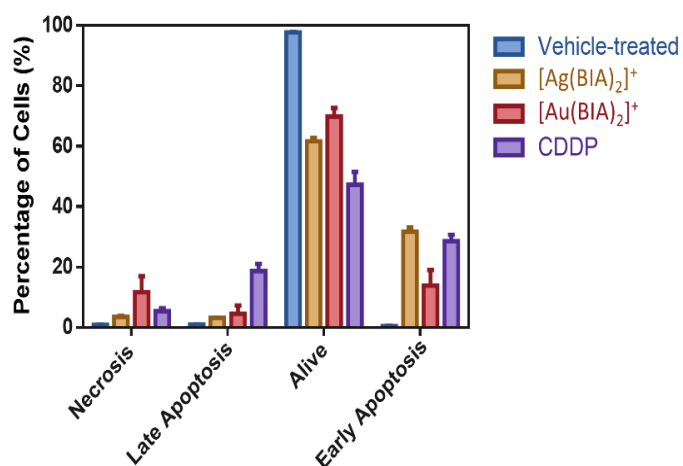

**Figure S17** Flow cytometry of human lung carcinoma cells (A549) with 24h of incubation, treated at the  $\text{IC}_{50}$  concentration of the complex. Error bars are the standard deviations over all the measured samples in two different experiments.

### Cellular uptake and $\log P_{o/w}$

**Table S1** Cellular uptake expressed as  $\mu\text{mol}$  of metal (M) in  $10^6$  cells, after 24 h of incubation at  $37^\circ\text{C}$ .  $\log P_{o/w} = \log([\text{complex}]_o / [\text{complex}]_w)$ , M = Ag, Au, or Pt.

|                               | $\mu\text{mol M}/\text{cells} (10^{-6})$ | $\log P_{o/w}$ |
|-------------------------------|------------------------------------------|----------------|
| $[\text{Ag}(\text{BIA})_2]^+$ | $51 \pm 2$                               | 1.0            |
| $[\text{Au}(\text{BIA})_2]^+$ | $52.3 \pm 0.5$                           | 1.8            |
| CDDP                          | $26 \pm 2$                               | -2.4           |

## BSA interaction

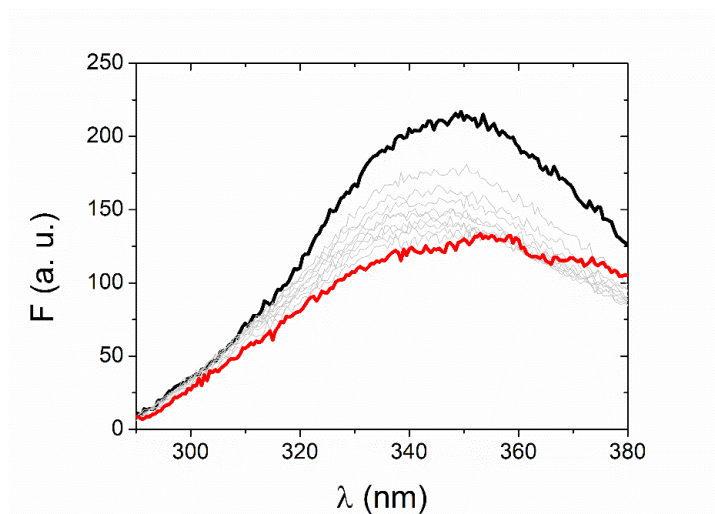

**Figure S18** Fluorescence spectra, corrected for dilution, of BSA in the presence of increasing amounts of  $[\text{Ag}(\text{BIA})_2]^+$ ;  $C_{\text{BSA}} = 1.03 \mu\text{M}$ ,  $C_{[\text{Ag}(\text{BIA})_2]^+}$  from 0 M (black line) to  $19.6 \mu\text{M}$  (red line); NaCl 0.1 M NaCac 2.5 mM, pH = 7.0, T = 25.0 °C; slits 3 nm.

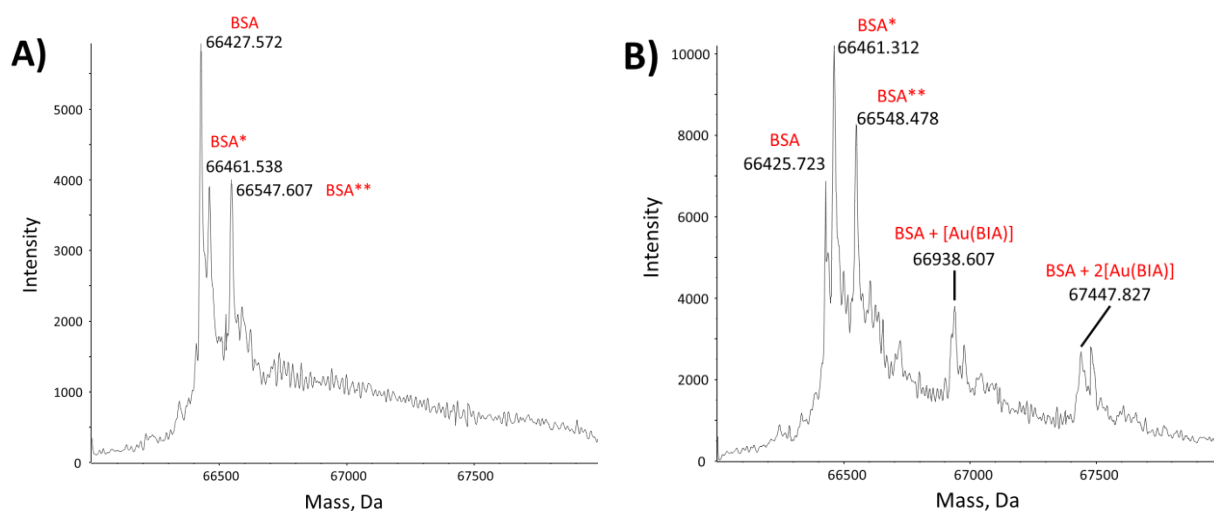

**Figure S19** Deconvoluted mass spectra of BSA alone (A),  $C_{\text{BSA}} = 1.00 \mu\text{M}$ , in presence of  $2.00 \mu\text{M}$  of  $[\text{Au}(\text{BIA})_2]^+$  (B) in  $\text{NH}_4\text{OAc}$  solution 20 mM, pH = 6.8, 0.1% v/v of formic acid has been added just before injection into the mass spectrometer. BSA\* = sulfinylation on Cys34; BSA\*\* = cysteinylation on Cys34.

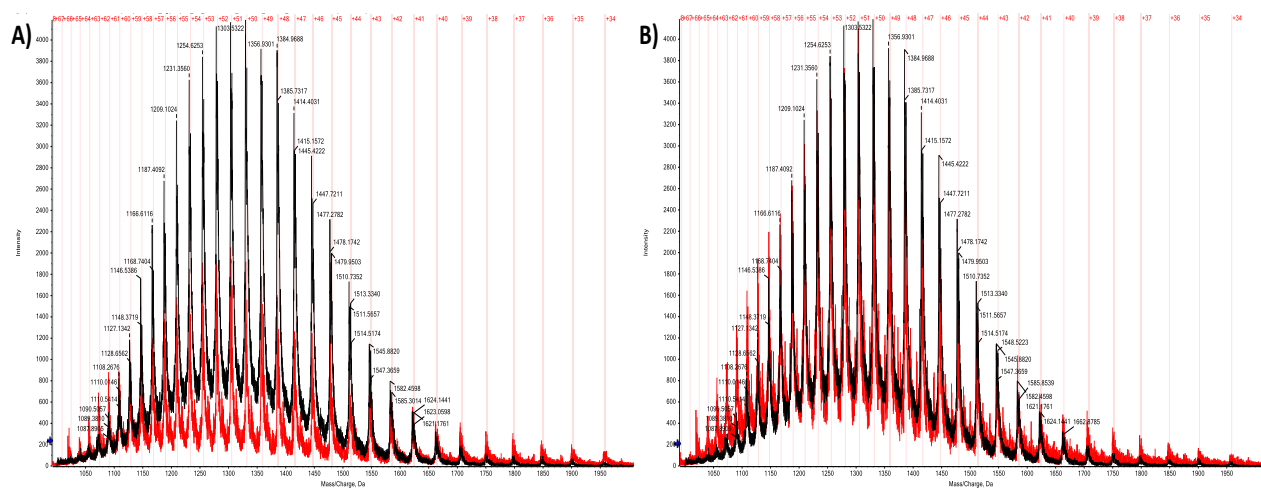

**Figure S20** Protonation state of the BSA alone (black line) and (A)  $[\text{Ag}(\text{BIA})_2]^+$ /BSA system (red line) or (B)  $[\text{Au}(\text{BIA})_2]^+$ /BSA system (red line).

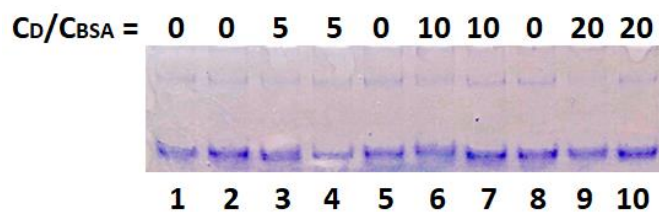

**Figure S21** Native acrylamide electrophoresis of BSA incubated overnight with  $[\text{Au}(\text{BIA})_2]^+$  and  $[\text{Ag}(\text{BIA})_2]^+$  complexes at 37.0 °C.  $\text{C}_{\text{BSA}} = 2 \mu\text{M}$ ,  $\text{C}_D = 10, 20$  and  $40 \mu\text{M}$ . Buffer NaCl 0.1 M, NaCac 2.5 mM, pH 7.0. **1)** BSA alone; **2, 5, 8)** BSA with 0.075%, 0.15%, and 0.3% of DMSO; **3, 6, 9)** BSA with  $[\text{Au}(\text{BIA})_2]^+$ ,  $\text{C}_D/\text{C}_{\text{BSA}} = 5.0, 10, 20$ ; **4, 7, 10)** BSA with  $[\text{Ag}(\text{BIA})_2]^+$ ,  $\text{C}_D/\text{C}_{\text{BSA}} = 5.0, 10, 20$ .

**Table S2** Equilibrium constants for  $[\text{Ag}(\text{BIA})_2]^+$ /BSA at different temperatures; 0.1 M NaCl, 2.5 mM NaCac, pH = 7.0.

| T (°C) | $K_{\text{BSA}} (10^6 \text{ M}^{-1})$ |
|--------|----------------------------------------|
| 15.0   | $0.50 \pm 0.03$                        |
| 25.0   | $1.92 \pm 0.07$                        |
| 37.0   | $2.9 \pm 0.1$                          |
| 48.0   | $8.3 \pm 0.6$                          |

**Table S3** Equilibrium constants for the marker+BSA exchange titrations with  $[\text{Ag}(\text{BIA})_2]^+$ ; 0.1 M NaCl, 2.5 mM NaCac, pH = 7.0, T = 25.0 °C.

|                       | Site | $K_{\text{BSA}} (10^5 \text{ M}^{-1})$ |
|-----------------------|------|----------------------------------------|
| <b>BSA</b>            |      | $19.2 \pm 0.7$                         |
| <b>Phenylbutazone</b> | I    | $12 \pm 1$                             |
| <b>Ibuprofen</b>      | II   | $5.8 \pm 0.3$                          |

## DNA/RNA interaction

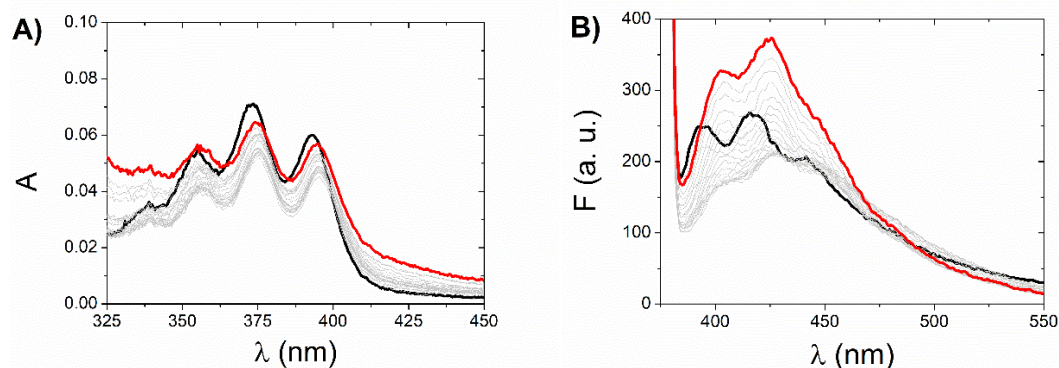

**Figure S22** (A) Absorbance spectra corrected for dilution of  $[\text{Au}(\text{BIA})_2]^+$  ( $C_{\text{Au}} = 8.73 \mu\text{M}$ ) at increasing amount of DNA from 0 (black line) to 463  $\mu\text{M}$  (red line). (B) Emission spectra ( $\lambda_{\text{ex}} = 374 \text{ nm}$ , slit 5 nm) corrected for dilution of  $[\text{Au}(\text{BIA})_2]^+$  ( $C_{\text{Au}} = 7.23 \mu\text{M}$ ) at increasing amount of DNA from 0 (black line) to 713  $\mu\text{M}$  (red line). NaCac 2.5 mM, pH = 7.0, T = 25.0 °C; DNA concentration in base pairs.

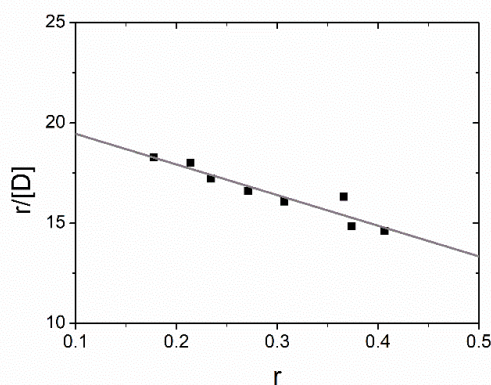

**Figure S23** Scatchard plot for the  $[\text{Ag}(\text{BIA})_2]^+/\text{DNA}$  system.  $C_{\text{Ag}} = 16.9 \mu\text{M}$ , NaCl 0.1 M, NaCac 2.5 mM, pH = 7.0, T = 25.0 °C. The Scatchard equation is as follows:

$$\frac{r}{[D]} = BK_{SC} - K_{SC}r$$

where  $r = [\text{PD}]/C_P$ , P is the polynucleotide base pair, D is the metal complex, PD is the metal complex/DNA adduct,  $[D] = C_D - [\text{PD}]$  and  $[\text{PD}] = \Delta A/\Delta \epsilon$ ,  $\Delta \epsilon = \epsilon_{\text{PD}} - \epsilon_{\text{D}}$  being  $\epsilon_i$  the molar extinction coefficient of the  $i$ -th species,  $K_{SC}$  is the Scatchard equilibrium constant and B is a parameter connected to the site size,  $n$  ( $n = (1+1/B)/2$ ). A plot of  $r/[D]$  over  $r$  yields  $K_{SC} = 1.53 \times 10^4 \text{ M}^{-1}$ ,  $K_{SC}B = 2.10 \times 10^4 \text{ M}^{-1}$  ( $\log K_{SC}B = 4.3$ ),  $B = 1.37$ ,  $n = 0.86$ .

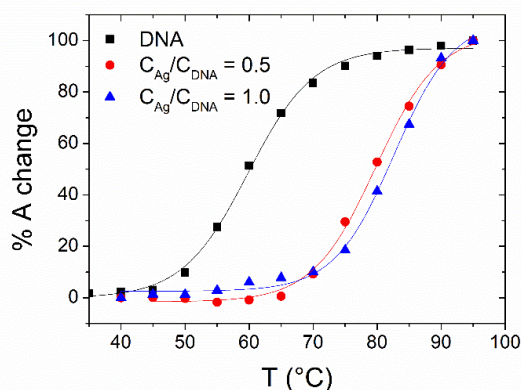

**Figure S24** Absorption (260 nm) as a function of temperature of DNA alone ( $C_{\text{DNA}} = 20.0 \mu\text{M}$ ) and in the presence of the metal complex  $[\text{Ag}(\text{BIA})_2]^+$  in the ratio  $C_{[\text{Ag}(\text{BIA})_2]^+}/C_{\text{DNA}}$  equal to 0.5 or 1.0, in buffer solution 2.5 mM NaCac, pH = 7.0.

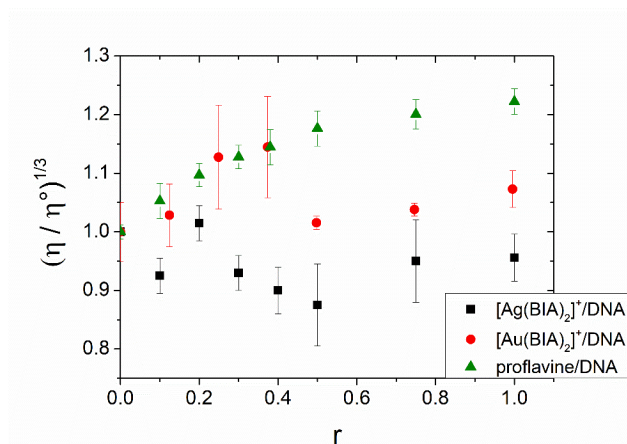

**Figure S25** Relative viscosity plot for the  $[\text{Ag}(\text{BIA})_2]^+/\text{DNA}$  (black square) or  $[\text{Au}(\text{BIA})_2]^+/\text{DNA}$  (red circles) systems as a function of the ratio  $r = C_D/C_{\text{DNA}}$ ;  $C_{\text{DNA}} = 118 \mu\text{M}$ ;  $\text{NaCl } 0.1 \text{ M}$ ,  $\text{NaCac } 2.5 \text{ mM}$ ,  $\text{pH } 7.0$ ,  $T = 25.0 \text{ }^\circ\text{C}$ ; DNA concentration in base pairs. The green triangles represent the results obtained in the case of the intercalator Proflavine.

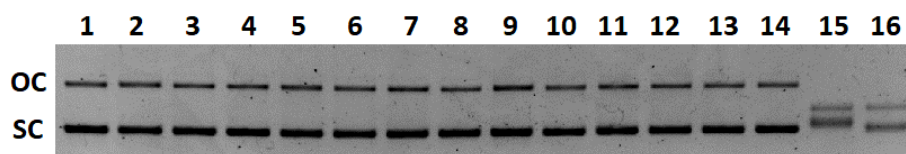

**Figure S26** Electrophoresis mobility assay after 24 h of incubation at  $37.0 \text{ }^\circ\text{C}$  of **1** and **8**) pUC18 ( $6.52 \mu\text{M}$  base pairs) alone; **2** and **9**) with the max % of DMSO used; **3-7**)  $[\text{Au}(\text{BIA})_2]^+$  in a ratio  $C_{\text{Au}} / C_{\text{pUC18}} = 0.1, 0.2, 0.3, 0.4, 0.5$ ; **10-14**)  $[\text{Ag}(\text{BIA})_2]^+$  in a ratio  $C_{\text{Ag}} / C_{\text{pUC18}} = 1.0, 2.0, 4.6, 6.4, 8.5$ ; **15-16**) CDDP in a ratio  $C_{\text{Pt}} / C_{\text{pUC18}} = 1.0, 2.0$ .  $\text{NaCac } 2.5 \text{ mM}$ ,  $\text{pH} = 7.0$ .

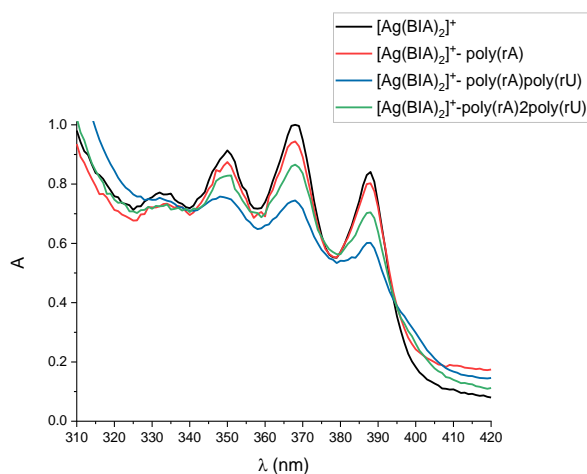

**Figure S27** Comparison of absorption spectra of  $[\text{Ag}(\text{BIA})_2]^+$  alone ( $C_{\text{Ag}} = 16.9 \mu\text{M}$ ) and in the presence of RNA in single (poly(rA)), double (poly(rA)poly(rU)), and triple (poly(rA)2poly(rU)) helix; complex:nucleic acid = 1:3 with nucleic acid expressed as phosphate groups, base pairs or base triplets respectively;  $\text{NaCac } 2.5 \text{ mM}$ ,  $\text{pH} = 7.0$ ,  $T = 25.0 \text{ }^\circ\text{C}$ .

**Table S4** Equilibrium constants from absorbance and fluorescence titrations calculated with different equations and methods for the  $[\text{Ag}(\text{BIA})_2]^+/\text{DNA}$  system at different concentrations of NaCl, NaCac 2.5 mM, pH = 7.0, T = 25.0 °C.

| ABSORBANCE $\log K_{\text{DNA}}$   |               |               |                |                |
|------------------------------------|---------------|---------------|----------------|----------------|
| - log [Na <sup>+</sup> ]           | Eq (1)        | Eq (2)        | HypSpec® n = 1 | HypSpec® n = 2 |
| 2.60                               | 4.920 ± 0.005 | 4.950 ± 0.005 | 4.61 ± 0.05    | 5.04 ± 0.05    |
| 2.30                               | 4.800 ± 0.005 | 4.77 ± 0.01   | 4.54 ± 0.02    | 4.97 ± 0.03    |
| 1.76                               | 4.490 ± 0.005 | 4.470 ± 0.005 | 4.39 ± 0.01    | 4.780 ± 0.005  |
| 1.24                               | 4.220 ± 0.005 | 4.200 ± 0.005 | 4.170 ± 0.005  | 4.530 ± 0.005  |
| 0.99                               | 4.09 ± 0.01   | 4.030 ± 0.005 | 3.97 ± 0.01    | 4.31 ± 0.01    |
| FLUORESCENCE $\log K_{\text{DNA}}$ |               |               |                |                |
| - log [Na <sup>+</sup> ]           | Eq (1)        | Eq (2)        | HypSpec® n = 1 | HypSpec® n = 2 |
| 2.60                               | 5.610 ± 0.005 | 5.650 ± 0.005 | 5.52 ± 0.05    | 5.83 ± 0.05    |
| 2.30                               | 5.420 ± 0.005 | 5.48 ± 0.02   | 5.35 ± 0.10    | 5.65 ± 0.10    |
| 1.76                               | 5.050 ± 0.005 | 5.08 ± 0.01   | 4.98 ± 0.10    | 5.28 ± 0.10    |
| 1.24                               | 4.520 ± 0.005 | 4.510 ± 0.005 | 4.50 ± 0.05    | 4.80 ± 0.05    |
| 0.99                               | 4.30 ± 0.02   | 4.300 ± 0.005 | 4.23 ± 0.03    | 4.53 ± 0.03    |

**Table S5** Melting temperature ( $T_m$ ) values for CT-DNA ( $C_{\text{DNA}} = 20.0 \mu\text{M}$ ) alone and in the presence of the  $[\text{Ag}(\text{BIA})_2]^+$  metal complex;  $\Delta T_m = T_m([\text{Ag}(\text{BIA})_2]^+/\text{DNA}) - T_m(\text{DNA})$ ; 2.5 mM NaCac, pH 7.0; DNA concentration in base pairs.

| $C_{[\text{Ag}(\text{BIA})_2]^+}/C_{\text{DNA}}$ | $T_m$ (°C) | $\Delta T_m$ (°C) |
|--------------------------------------------------|------------|-------------------|
| 0.0                                              | 59.8 ± 0.3 | -                 |
| 0.5                                              | 79.8 ± 0.4 | 20.0 ± 0.7        |
| 1.0                                              | 82.6 ± 0.5 | 22.8 ± 0.8        |

**Table S6** Melting temperature ( $T_m$ ) values for double helix RNA alone ( $C_{\text{AU}} = 20.2 \mu\text{M}$ ) and in the presence of an equal amount of complex  $[\text{Ag}(\text{BIA})_2]^+$ ; all buffers also contain NaCac 2.5 mM, pH = 7.0; RNA concentration in base pairs.

| $C_{\text{NaCl}}$ (M) | $T_m$ (°C)<br>poly(rA)poly(rU) | $T_m$ (°C)<br>$[\text{Ag}(\text{BIA})_2]^+/\text{poly}(\text{rA})\text{poly}(\text{rU})$ | $\Delta T_m$ (°C) |
|-----------------------|--------------------------------|------------------------------------------------------------------------------------------|-------------------|
| 0                     | 43.6 ± 0.5                     | 48.0 ± 1.0                                                                               | 4.4 ± 1.5         |
| 0.007                 | 42.2 ± 0.3                     | 44.1 ± 0.6                                                                               | 1.9 ± 0.9         |
| 0.100                 | 56.3 ± 0.3                     | 52.8 ± 0.5                                                                               | -3.5 ± 0.8        |

## G-quadruplexes

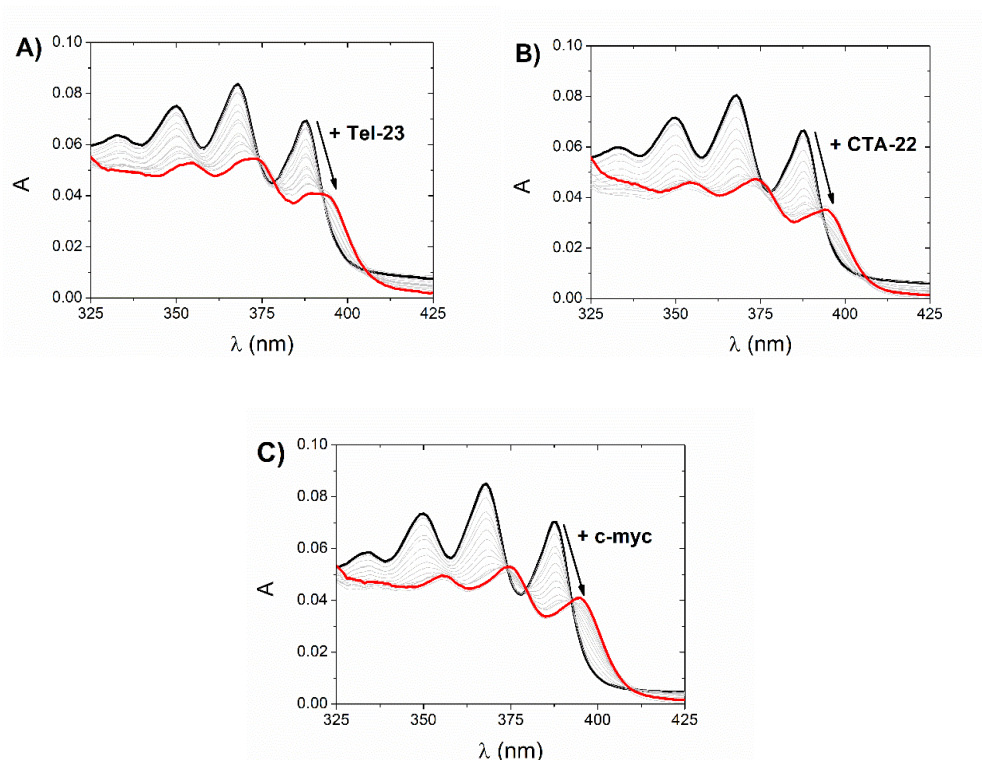

**Figure S28** Absorbance spectra of  $[\text{Ag}(\text{BIA})_2]^+$  (corrected by dilution), at increasing amounts of A) Tel-23 from 0 to 63.2  $\mu\text{M}$ ; B) CTA-22 from 0 to 55.4  $\mu\text{M}$ ; C) c-myc from 0 to 53.5  $\mu\text{M}$ .  $C_{\text{Ag}} = 16.9 \mu\text{M}$ , KCl 0.1 M, LiCac 2.5 mM, pH = 7.0, T = 25.0  $^\circ\text{C}$ .

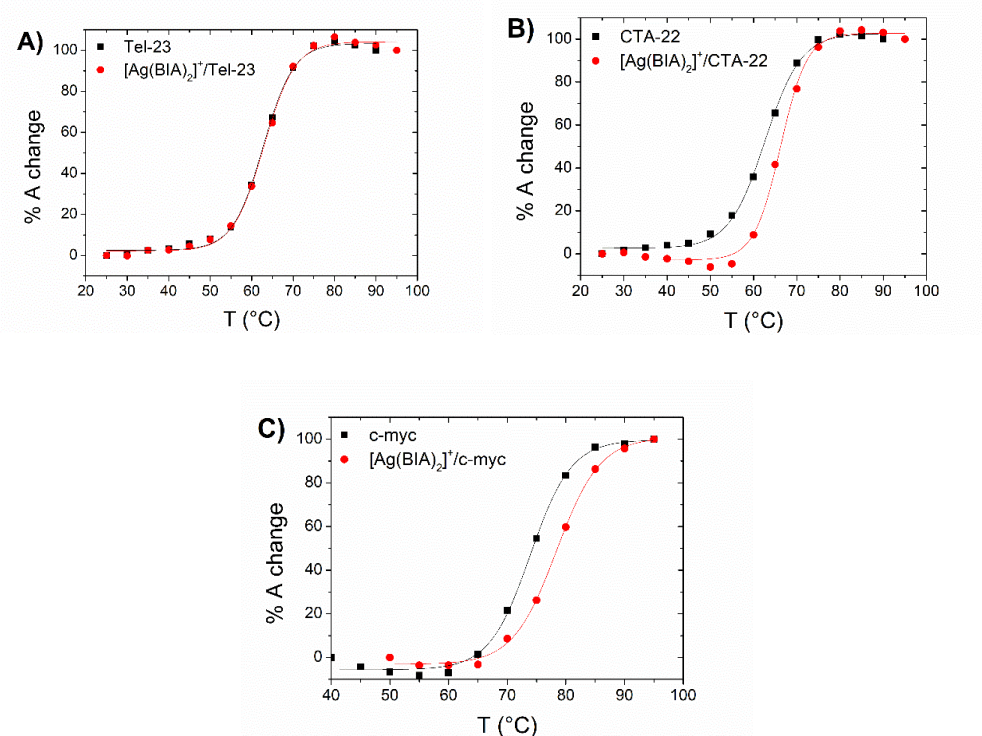

**Figure S29** Melting curves for the G4 alone and metal complex/G4 mixtures. A) Tel-23 and  $[\text{Ag}(\text{BIA})_2]^+/\text{Tel-23}$ ; B) CTA-22 and  $[\text{Ag}(\text{BIA})_2]^+/\text{CTA-22}$ ; C) c-myc and  $[\text{Ag}(\text{BIA})_2]^+/\text{c-myc}$ .  $C_{\text{G4}} = 25.0 \mu\text{M}$  (in strands),  $[\text{complex}]/[\text{G4}] = 0.5$ . KCl 0.1 M, LiCac 2.5 mM, pH = 7.0 for Tel23 and CTA22 (KCl 0.01 M for c-myc). This difference is needed as the c-myc is very stable and a higher concentration of KCl would stabilise so much that the structure would have a denaturation temperature out of the detection window.



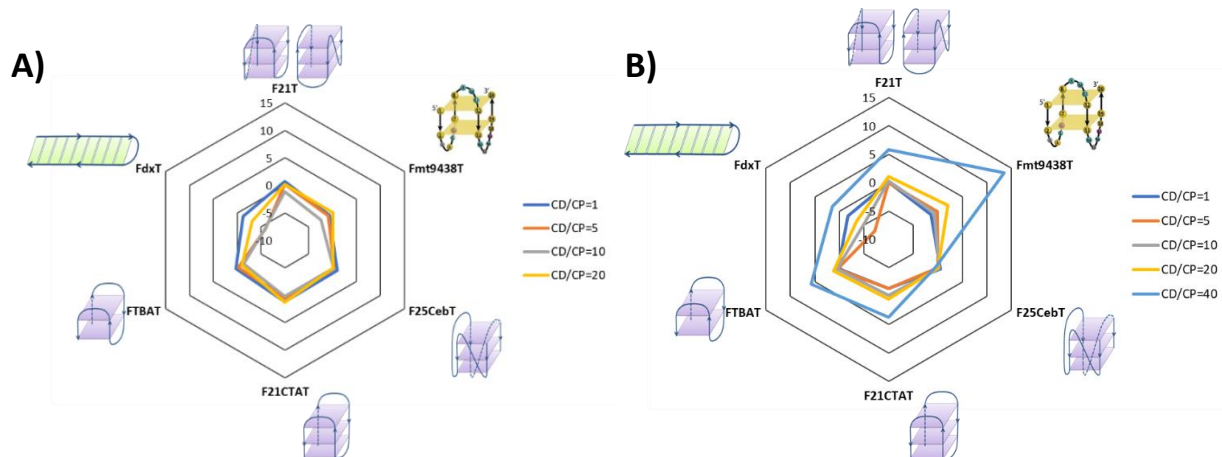

**Figure S30** Spider plot of FRET melting of P = polynucleotide, and D = metal complex, where  $C_P = 0.2 \mu\text{M}$  (in strands), of the systems: A)  $[\text{Ag}(\text{BIA})_2]^+/\text{P}$  with  $C_D/C_P = 1.0, 5.0, 10,$  and  $20$ ; B)  $[\text{Au}(\text{BIA})_2]^+/\text{P}$  with  $C_D/C_P = 1.0, 5.0, 10, 20$  and  $40$ . KCl  $10 \text{ mM}$ , LiCl  $90 \text{ mM}$ , LiCac  $10 \text{ mM}$ , pH =  $7.0$ .

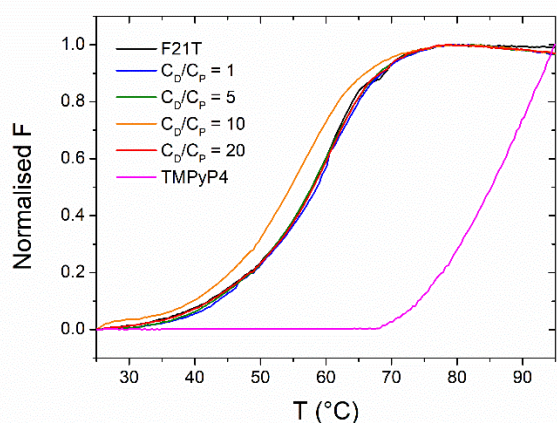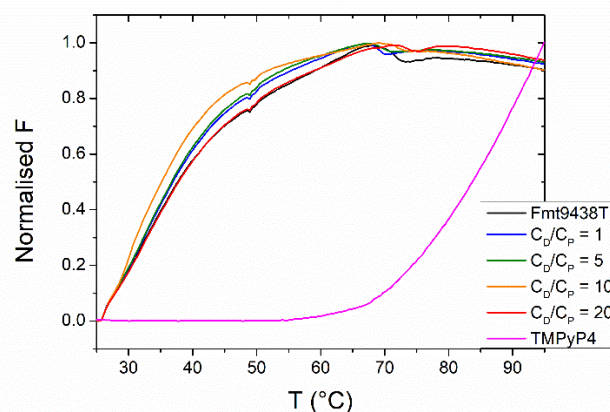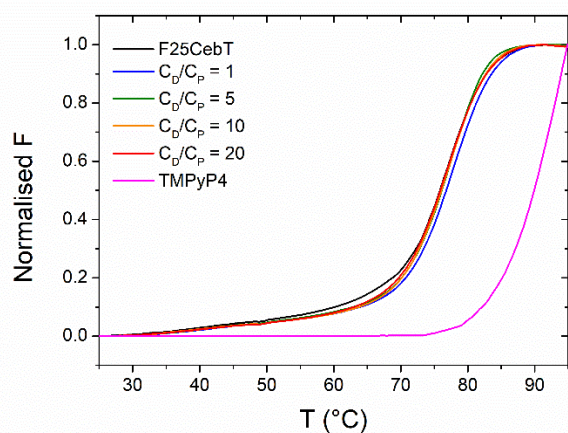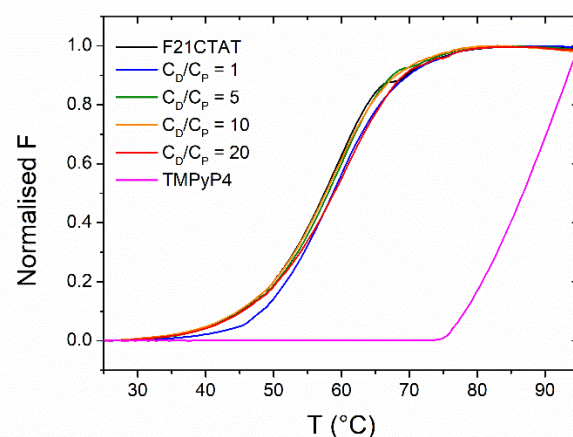

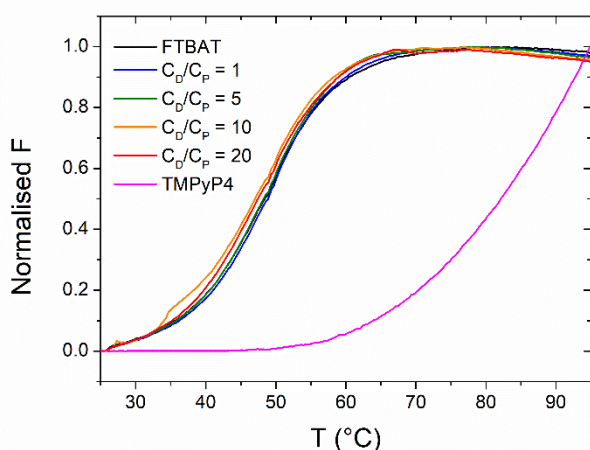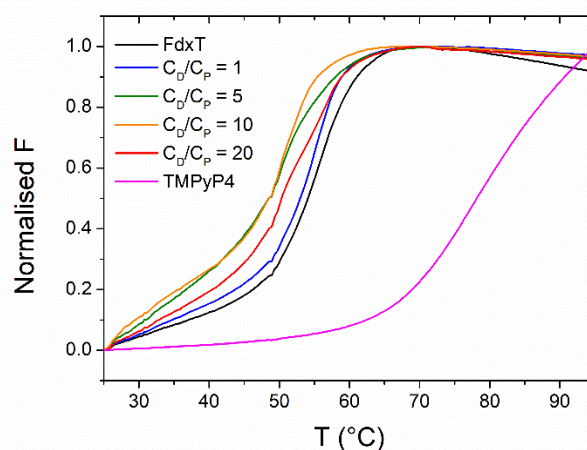

**Figure S31** Normalised FRET melting profile of P = polynucleotide, and D = metal complex, where  $C_p = 0.2 \mu\text{M}$  (in strands), of the systems  $[\text{Ag}(\text{BIA})_2]^+/\text{P}$  of Figure S30A. TMPyP4 is used as positive control at  $C = 2.0 \mu\text{M}$ . KCl 10 mM, LiCl 90 mM, LiCac10 mM, pH = 7.0. The data are the one of a single experiment but final values of Figure S29A are the mean of four experiments.

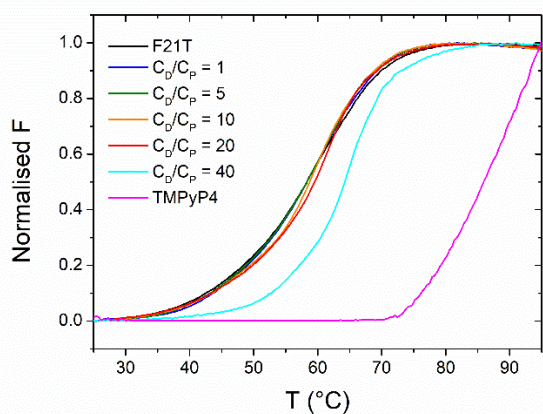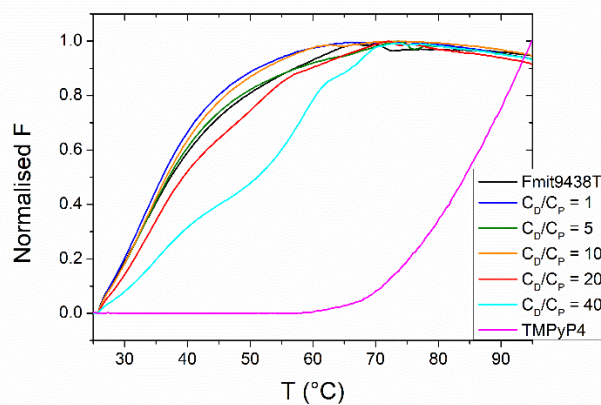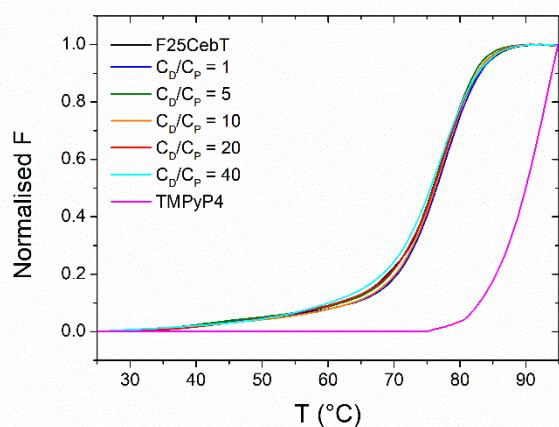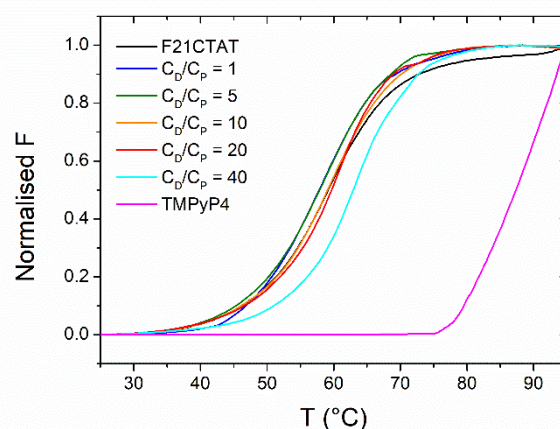

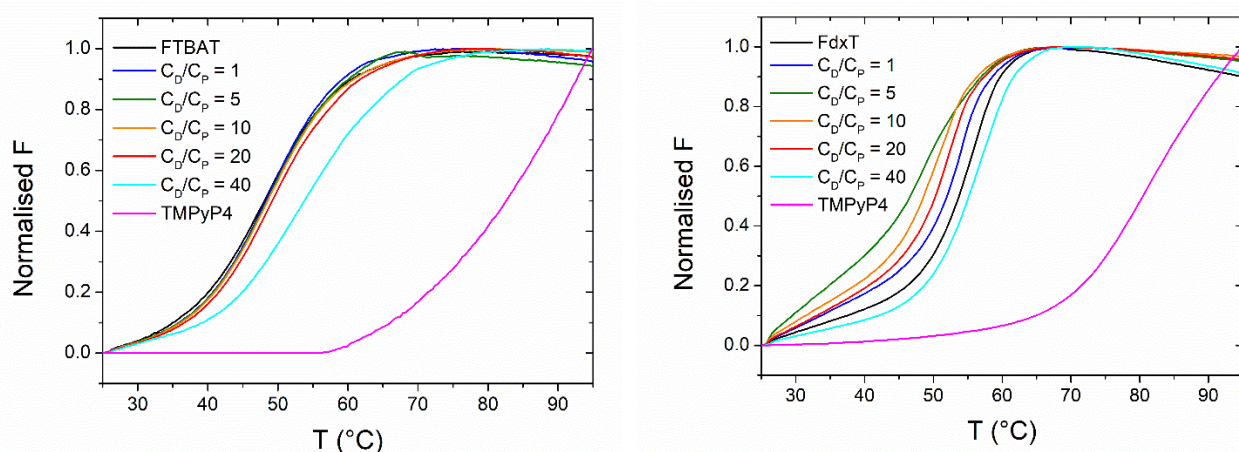

**Figure S32** Normalised FRET melting profile of P = polynucleotide, and D = metal complex, where  $C_p = 0.2 \mu\text{M}$  (in strands), of the systems  $[\text{Au}(\text{BIA})_2]^+/\text{P}$  of Figure S30B. TMPyP4 is used as positive control at  $C = 2.0 \mu\text{M}$ . KCl 10 mM, LiCl 90 mM, LiCac10 mM, pH = 7.0. The data are the one of a single experiment but final values of Figure S29B are the mean of four experiments.

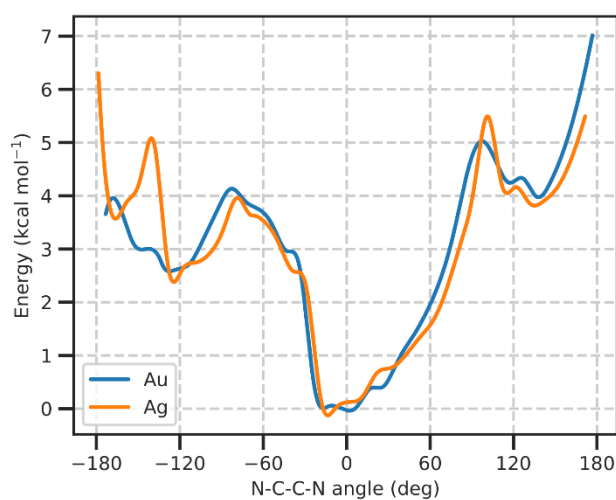

**Figure S33** Relaxed scans of the N-C-C-N dihedral angle for both the Ag and Au complexes.

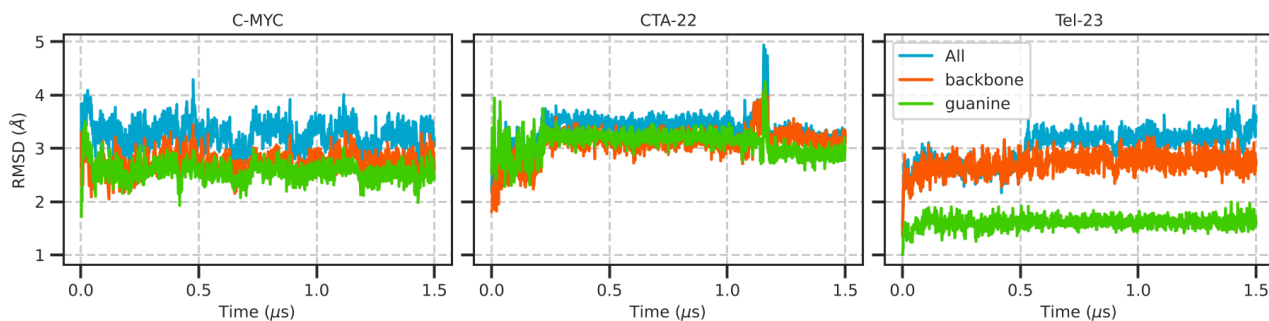

**Figure S34** RMSD computed along the MM MD for the three targets.

**Table S7** Lowest binding energy ( $\Delta G$ ), in  $\text{kcal mol}^{-1}$ , for the two metal complexes docked in Tel-23, CTA-22, and c-myc G-quadruplexes. The lowest docking binding energy ( $\text{kcal mol}^{-1}$ ), the stronger the ligand-target interaction.

|                                          | <b>Tel-23</b> | <b>CTA-22</b> | <b>c-myc</b> |
|------------------------------------------|---------------|---------------|--------------|
| <b>[Ag(BIA)<sub>2</sub>]<sup>+</sup></b> | -2.64         | -2.81         | -3.17        |
| <b>[Au(BIA)<sub>2</sub>]<sup>+</sup></b> | -3.02         | -3.01         | -2.72        |

**Table S8** Spectral characteristics and bathochromic shift of absorption maxima of the [Ag(BIA)<sub>2</sub>]<sup>+</sup> complex following the interaction with G4 of different conformations; KCl 0.1 M LiCac 2.5 mM, pH 7.0.

|                                                   | $\lambda_1$ (nm) | $\lambda_2$ (nm) | $\lambda_3$ (nm) | $\lambda_4$ (nm) |
|---------------------------------------------------|------------------|------------------|------------------|------------------|
| <b>[Ag(BIA)<sub>2</sub>]<sup>+</sup></b>          | 334              | 350              | 369              | 388              |
| <b>[Ag(BIA)<sub>2</sub>]<sup>+</sup> / Tel-23</b> | 338 (+4)         | 356 (+6)         | 375 (+6)         | 395 (+7)         |
| <b>[Ag(BIA)<sub>2</sub>]<sup>+</sup> / CTA-22</b> | 338 (+4)         | 354 (+4)         | 373 (+4)         | 394 (+6)         |
| <b>[Ag(BIA)<sub>2</sub>]<sup>+</sup> / c-myc</b>  | 337 (+3)         | 355 (+5)         | 374 (+6)         | 394 (+6)         |

## Experimental details

**Table S9** Melting temperatures of the different studied biosubstrates with their suitable buffer solutions.

| Biosubstrate                   | T <sub>m</sub> (°C) | Buffer                             |
|--------------------------------|---------------------|------------------------------------|
| CT-DNA                         | 59.8 ± 0.3          | NaCac 2.5 mM, pH = 7.0             |
| poly(rA)poly(rU)               | 56.3 ± 0.3          | NaCl 0.1 M, NaCac 2.5 mM, pH = 7.0 |
| poly(rA) <sub>2</sub> poly(rU) | 56.0 ± 0.3          | NaCl 0.1 M, NaCac 2.5 mM, pH = 7.0 |
| Tel-23                         | 62.8 ± 0.3          | KCl 0.1 M, LiCac 2.5 mM, pH = 7.0  |
| CTA-22                         | 62.6 ± 0.2          | KCl 0.1 M, LiCac 2.5 mM, pH = 7.0  |
| c-myc                          | 74.0 ± 0.4          | KCl 0.01 M, LiCac 2.5 mM, pH = 7.0 |
| i-motif                        | 47.8 ± 0.1          | NaCac 50 mM, pH = 5.5              |

**Table S10** Sequences and Topologies of the double-labelled oligonucleotides used in this work.

| Name      | Sequence (5' – 3')                               | Topology                                                                 |
|-----------|--------------------------------------------------|--------------------------------------------------------------------------|
| F21T      | FAM-GGTTAGGGTTAGGGTTAGGG-TAMRA                   | Doubly labelled 3-tetrad Hybrid DNA G4 of human telomere                 |
| Fmit9438T | FAM-GGCGTAGGTTTGGTCTAGGG-TAMRA                   | Doubly labelled 2-tetrad Antiparallel mitochondrial DNA G4               |
| F25CebT   | FAM-AGGGTGGGTGTAAGTGTGGGTGGGT-TAMRA              | Doubly labelled 3-tetrad Parallel DNA G4 of human minisatellite          |
| F21CTAT   | FAM-GGGCTAGGGCTAGGGCTAGGG-TAMRA                  | Doubly labelled 3-tetrad Antiparallel DNA G4 of human telomere           |
| FTBAT     | FAM-GGTTGGTGTGGTTGG-TAMRA                        | Doubly labelled 2-tetrad Antiparallel DNA G4 of Thrombin binding aptamer |
| FdxT      | FAM-TATAGCTAT-hexaethyleneglycolTATAGCTATA-TAMRA | Doubly labelled Intramolecular duplex                                    |

## K summary table

**Table S11** Equilibrium constants 25 °C of  $[\text{Ag}(\text{BIA})_2]^+$ /biomolecule systems. HypSpec® software values with a 1:1 stoichiometry. For DNA, RNA and BSA buffer solution NaCl 0.1 M, NaCac 2.5 mM, pH = 7.0; G4 buffer solution KCl 0.1 M, LiCac 2.5 mM, pH = 7.0; i-motif NaCac 50 mM, pH = 5.5.

|                         | <b>K(10<sup>5</sup> M<sup>-1</sup>)</b> |
|-------------------------|-----------------------------------------|
| <b>DNA double helix</b> | 0.095 ± 0.005                           |
| <b>RNA double helix</b> | -                                       |
| <b>RNA triple helix</b> | -                                       |
| <b>G4 Tel-23</b>        | 18 ± 5                                  |
| <b>G4 CTA-22</b>        | 8.7 ± 0.8                               |
| <b>G4 c-myc</b>         | 7.2 ± 0.8                               |
| <b>i-motif</b>          | 0.32 ± 0.07                             |
| <b>BSA</b>              | 19.2 ± 0.7                              |
